# Supplementary material for: LncMirNet: Predicting LncRNA–miRNA Interaction Based on Deep Learning of Ribonucleic Acid Sequences
Source: MDPI journal article supplement (doi:10.3390/molecules25194372), 2020-09-23
Supplement: s1 [file s1]

## How to run LncMirNet?

There are four steps to run LncMirNet.

- 1) preparing lncRNA sequences and miRNA sequences with Fasta format.
- 2) using k-mer, CTD, doc2vec, and role2vec to calculate lncRNA sequences features and miRNA sequence features.
- 3) feed these features to the LncMirNet model.
- 4) the predicted results are listed in a result file with csv format.

Following the commands, you will get the predicted results.

### **create conda env and activate the env**

```
conda create -n lnc_mir python=3.6
conda activate lnc_mir
```

### **install dependency**

```
conda install numpy=1.18.5
conda install pandas=1.0.5
conda install networkx=2.4
conda install tensorflow-gpu=1.15
conda install keras=2.3.1
conda install scikit-learn=0.22
conda install biopython=1.77
pip install gensim==3.8.3
pip install tqdm==4.28.1
pip install texttable==1.5.0
pip install scipy==1.1.0
```

### **download source code**

```
git clone https://github.com/abcair/LncMirNet.git
```

### **Modify file path**

```
cd test
```

change lnc\_path and mir\_path in parameters.py file

```
lnc_path = "./lncRNA_test.fa"
mir_path = "./miRNA_test.fa"
result_path = "test_result.csv"
```

### **Run test**

```
python test.py
```

### **Result**

the predicted result will save in test\_result.csv

In the test directory, we list a lncRNA.fasta demo file and a miRNA.fasta demo file. The predicted results are save in test\_result.csv.
