# Supplementary figures and images for: LncMirNet: Predicting LncRNA–miRNA Interaction Based on Deep Learning of Ribonucleic Acid Sequences
Source: MDPI journal article supplement (doi:10.3390/molecules25194372), 2020-09-23

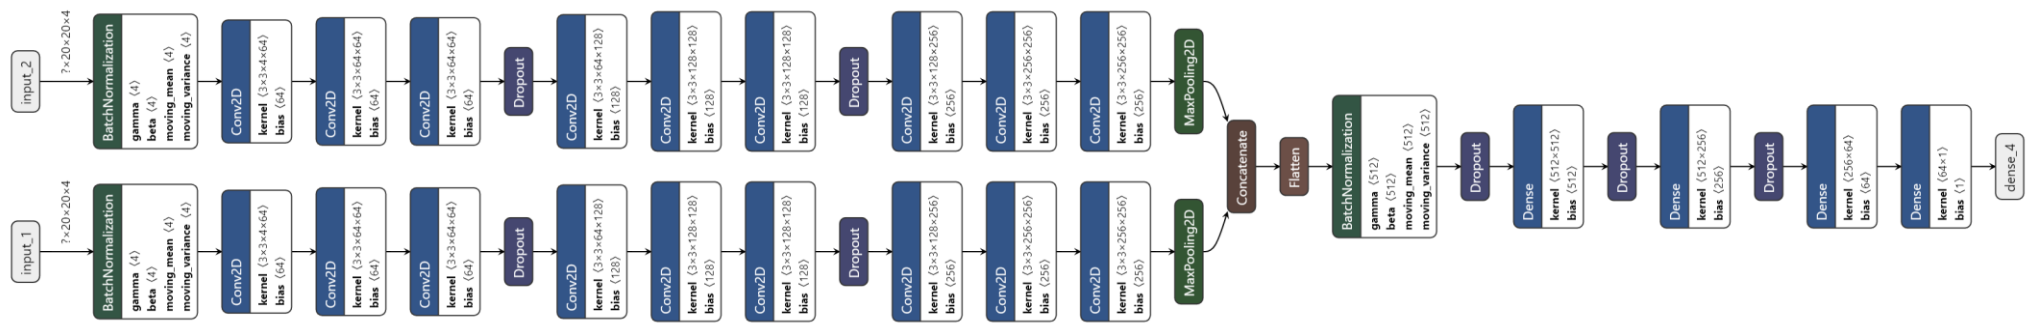

Supplementary Figure 1. The detailed struct of LncMirNet.

Supplement: s1 [file s1]
